# Supplementary material for: Dynamic functional characterization and phylogenetic changes due to Long Chain Fatty Acids pulses in biogas reactors
Source: PubMed Central journal article supplement (PMC4926282; doi:10.1038/srep28810), 2016-06-29
Supplement: srep28810-s1.pdf [file srep28810-s1.pdf]

# **Dynamic functional characterization and phylogenetic changes due to Long Chain Fatty Acids pulses in biogas reactors**

Panagiotis G. Kougias<sup>1,\*,+</sup>, Laura Treu<sup>1,+</sup>, Stefano Campanaro<sup>2,+</sup>, Xinyu Zhu<sup>1</sup>, Irimi Angelidaki<sup>1</sup>

<sup>1</sup>Department of Environmental Engineering, Technical University of Denmark, Kgs. Lyngby, Denmark

<sup>2</sup>Department of Biology, University of Padova, Via U. Bassi 58/b, 35121, Padova Italy

\* panak@env.dtu.dk

<sup>+</sup>These authors contributed equally to this work.

## **Supporting information includes:**

Supplementary Table S1 and S2

Supplementary Figure S1

Supplementary Datasets S1 and S2

**Supplementary Table S1.** Results from the sequencing

| <b>SAMPLE NAME</b> | <b>SRA ACCESSION NUMBER</b> | <b>FILTERED READS</b> | <b>% READS ALIGNED</b> |
|--------------------|-----------------------------|-----------------------|------------------------|
| PHASE1 NA-I        | SRS933560                   | 53928985              | 68.27%                 |
| PHASE1 NA-II       | SRS933567                   | 56397104              | 57.03%                 |
| SHOCK2NA-I         | SRS933904                   | 47344505              | 64.81%                 |
| SHOCK2NA-II        | SRS933910                   | 18623671              | 76.57%                 |
| SHOCK3NA-I         | SRS977279                   | 44493386              | 66.92%                 |
| SHOCK3NA-II        | SRS977278                   | 16941503              | 78.18%                 |
| STEADY2NA-I        | SRS933912                   | 39312798              | 66.36%                 |
| STEADY2NA-II       | SRS977280                   | 27516536              | 82.09%                 |
| STEADY3NA-I        | SRS977277                   | 39594102              | 66.61%                 |
| STEADY3NA-II       | SRS977276                   | 35220695              | 78.23%                 |
| PHASE1 A-I         | SRS933582                   | 57677194              | 70.40%                 |
| PHASE1 A-II        | SRS933583                   | 56150684              | 70.04%                 |
| SHOCK2A-I          | SRS977273                   | 39194561              | 67.64%                 |
| SHOCK2A-II         | SRS977274                   | 37263499              | 64.12%                 |
| SHOCK3A-I          | SRS977271                   | 36430494              | 69.15%                 |
| SHOCK3A-II         | SRS977270                   | 22525923              | 78.05%                 |
| STEADY2A-I         | SRS977272                   | 43827775              | 67.20%                 |
| STEADY2A-II        | SRS977275                   | 20953549              | 79.00%                 |
| STEADY3A-I         | SRS977269                   | 26672721              | 73.38%                 |
| STEADY3A-II        | SRS977268                   | 20849959              | 78.16%                 |

**Supplementary Table S2.** List with the 45 Genome Bins and their average relative abundance within the experimental periods; non-acclimatised (na), acclimatised (a), LCFA shock of 2 g/L (2), LCFA shock of 3 g/L (3)

| ID   | Extended name                 | PERIOD I (na) | PERIOD II (2na) | PERIOD III (2na) | PERIOD II (3na) | PERIOD III (3na) | PERIOD I (a) | PERIOD II (2a) | PERIOD III (2a) | PERIOD II (3a) | PERIOD III (3a) |
|------|-------------------------------|---------------|-----------------|------------------|-----------------|------------------|--------------|----------------|-----------------|----------------|-----------------|
| Ac01 | Actinomycetales sp. DTU046    | 2.60          | 0.04            | 0.00             | 0.07            | 0.00             | 0.19         | 0.02           | 0.00            | 0.02           | 0.01            |
| Ba01 | Rikenellaceae sp. DTU001      | 29.31         | 108.43          | 93.84            | 94.95           | 115.15           | 49.88        | 69.77          | 78.56           | 69.69          | 73.60           |
| Ba02 | Rikenellaceae sp. DTU002      | 8.17          | 0.01            | 0.00             | 0.02            | 0.00             | 0.04         | 0.00           | 0.00            | 0.00           | 0.00            |
| Ba03 | Porphyromonadaceae sp. DTU003 | 0.49          | 0.63            | 0.02             | 0.99            | 0.03             | 1.13         | 0.98           | 0.01            | 0.84           | 0.02            |
| Ba06 | Porphyromonadaceae sp. DTU048 | 1.24          | 0.68            | 0.03             | 1.15            | 0.04             | 0.83         | 0.88           | 0.01            | 0.86           | 0.02            |
| Eu01 | Methanoculleus sp. DTU006     | 158.57        | 46.22           | 20.46            | 56.21           | 7.61             | 231.69       | 1.88           | 5.31            | 5.16           | 0.00            |
| Eu02 | Methanoculleus sp. DTU007     | 2.35          | 2.60            | 2.97             | 1.63            | 1.84             | 4.10         | 1.15           | 0.44            | 1.99           | 9.40            |
| Eu04 | Methanosarcina sp. DTU009     | 0.00          | 7.64            | 14.03            | 7.40            | 10.74            | 0.20         | 9.03           | 2.67            | 3.68           | 0.52            |
| Fi03 | Clostridiales sp. DTU012      | 18.95         | 14.71           | 30.53            | 21.27           | 29.02            | 15.83        | 27.97          | 26.93           | 27.74          | 4.54            |
| Fi07 | Syntrophothermus sp. DTU052   | 16.00         | 0.36            | 0.39             | 0.49            | 0.35             | 5.85         | 0.78           | 0.53            | 0.62           | 27.20           |
| Fi09 | Syntrophomonas sp. DTU018     | 0.06          | 20.04           | 12.23            | 14.23           | 11.25            | 1.43         | 16.24          | 6.21            | 24.37          | 0.46            |
| Fi11 | Clostridiales sp. DTU020      | 1.41          | 0.11            | 0.01             | 0.16            | 0.02             | 4.25         | 2.46           | 0.02            | 2.55           | 11.06           |
| Fi14 | Clostridiales sp. DTU023      | 6.16          | 0.64            | 0.03             | 0.94            | 0.05             | 0.55         | 0.28           | 0.02            | 0.28           | 0.03            |
| Fi15 | Clostridiales sp. DTU024      | 4.16          | 0.71            | 0.01             | 1.22            | 0.03             | 0.88         | 0.14           | 0.02            | 0.15           | 0.02            |
| Fi21 | Halothermothrix sp. DTU029    | 3.31          | 36.17           | 23.95            | 26.59           | 22.50            | 5.02         | 47.77          | 29.56           | 51.05          | 0.03            |
| Fi22 | Clostridia sp. DTU030         | 6.33          | 2.68            | 1.95             | 3.14            | 1.59             | 4.78         | 3.14           | 2.27            | 3.03           | 31.79           |
| Fi23 | Clostridiales sp. DTU031      | 0.16          | 0.06            | 0.01             | 0.09            | 0.02             | 6.77         | 3.53           | 0.15            | 3.63           | 2.65            |
| Fi26 | Clostridiales sp. DTU035      | 0.02          | 0.02            | 0.00             | 0.02            | 0.00             | 1.25         | 2.00           | 0.02            | 2.03           | 0.20            |
| Fi27 | Clostridiales sp. DTU036      | 0.00          | 0.00            | 0.00             | 0.01            | 0.00             | 5.19         | 6.04           | 0.26            | 5.41           | 0.03            |
| Fi30 | Clostridiales sp. DTU058      | 1.14          | 7.13            | 8.10             | 7.94            | 9.84             | 2.16         | 7.86           | 13.65           | 5.89           | 0.33            |
| Fi31 | Clostridiaceae sp. DTU059     | 1.54          | 4.18            | 1.75             | 3.73            | 2.16             | 1.51         | 13.26          | 2.23            | 12.14          | 24.11           |
| Fi33 | Clostridia sp. DTU062         | 0.20          | 1.22            | 2.28             | 1.52            | 2.44             | 0.37         | 6.92           | 2.00            | 6.07           | 14.28           |
| Fi35 | Clostridiales sp. DTU064      | 0.48          | 5.17            | 5.07             | 6.73            | 6.04             | 0.39         | 4.50           | 3.54            | 4.78           | 2.38            |
| Fi36 | Clostridia sp. DTU065         | 1.25          | 2.54            | 2.82             | 3.27            | 2.23             | 1.48         | 4.74           | 2.21            | 3.88           | 1.86            |

|      |                                |      |       |       |       |       |       |       |       |      |       |
|------|--------------------------------|------|-------|-------|-------|-------|-------|-------|-------|------|-------|
| Fi40 | Clostridiales sp. DTU070       | 0.81 | 1.02  | 1.40  | 1.39  | 1.59  | 0.95  | 4.13  | 1.18  | 4.39 | 3.38  |
| Fi45 | Clostridiales sp. DTU076       | 0.10 | 1.38  | 1.05  | 0.57  | 1.17  | 0.13  | 1.29  | 4.55  | 1.38 | 2.01  |
| Fi48 | Clostridiaceae sp. DTU079      | 0.35 | 2.81  | 1.70  | 3.00  | 2.40  | 0.52  | 1.45  | 2.05  | 1.38 | 1.43  |
| Fi51 | Clostridiales sp. DTU082       | 1.02 | 0.32  | 0.02  | 0.59  | 0.03  | 1.10  | 1.86  | 0.06  | 1.83 | 0.03  |
| Fi52 | Clostridiales sp. DTU083       | 1.49 | 1.82  | 1.62  | 2.78  | 1.80  | 1.95  | 1.62  | 2.40  | 1.32 | 3.72  |
| Fi56 | Clostridia sp. DTU088          | 0.29 | 0.46  | 0.36  | 0.62  | 0.38  | 0.20  | 1.78  | 0.15  | 1.68 | 1.81  |
| Fi59 | Erysipelothrix sp. DTU091      | 0.23 | 0.44  | 0.04  | 0.70  | 0.07  | 0.23  | 0.71  | 0.05  | 0.73 | 0.08  |
| Fi63 | Eubacteriaceae sp. DTU096      | 0.48 | 0.85  | 0.14  | 1.34  | 0.30  | 0.38  | 1.46  | 0.27  | 1.34 | 2.54  |
| Fi66 | Clostridiales sp. DTU099       | 1.48 | 0.13  | 0.00  | 0.20  | 0.00  | 0.12  | 0.04  | 0.00  | 0.04 | 0.19  |
| Fi67 | Clostridiales sp. DTU100       | 0.88 | 0.25  | 0.01  | 0.50  | 0.02  | 0.07  | 0.05  | 0.02  | 0.05 | 0.05  |
| Fi68 | Clostridiales sp. DTU101       | 1.76 | 0.18  | 0.00  | 0.31  | 0.00  | 0.03  | 0.01  | 0.00  | 0.01 | 0.30  |
| Fi69 | Clostridiales sp. DTU071       | 5.27 | 1.08  | 0.03  | 1.99  | 0.06  | 2.42  | 0.83  | 0.02  | 0.86 | 0.00  |
| Pr01 | Gammaproteobacteria sp. DTU037 | 5.64 | 1.85  | 0.01  | 2.46  | 0.01  | 13.38 | 0.87  | 0.01  | 1.05 | 0.03  |
| Pr10 | Alcaligenaceae sp. DTU106      | 2.35 | 0.14  | 0.00  | 0.21  | 0.01  | 0.97  | 0.35  | 0.01  | 0.41 | 0.00  |
| Sp01 | Spirochaeta sp. DTU042         | 1.74 | 0.08  | 0.00  | 0.12  | 0.00  | 0.36  | 0.14  | 0.00  | 0.14 | 0.01  |
| Sy05 | Synergistaceae sp. DTU109      | 0.01 | 0.01  | 0.00  | 0.01  | 0.00  | 0.38  | 0.71  | 0.07  | 0.69 | 0.01  |
| Sy06 | Synergistales sp. DTU110       | 0.80 | 0.55  | 0.06  | 0.84  | 0.10  | 0.11  | 0.14  | 0.01  | 0.14 | 0.00  |
| Te01 | Acholeplasmatales sp. DTU056   | 0.37 | 14.90 | 11.45 | 8.53  | 8.05  | 0.20  | 6.51  | 17.34 | 8.52 | 0.08  |
| Th01 | Thermotogaceae sp. DTU111      | 0.67 | 14.09 | 27.30 | 16.52 | 26.84 | 0.65  | 10.50 | 33.37 | 9.85 | 0.02  |
| Th02 | Thermotogales sp. DTU112       | 0.47 | 7.69  | 14.04 | 8.99  | 14.26 | 0.55  | 6.22  | 18.16 | 5.63 | 31.83 |
| Tm01 | TM7 DTU050                     | 0.54 | 0.15  | 0.00  | 0.23  | 0.01  | 0.01  | 0.00  | 0.00  | 0.00 | 17.69 |

a) Fi07- *Syntrophothermus* sp. DTU052

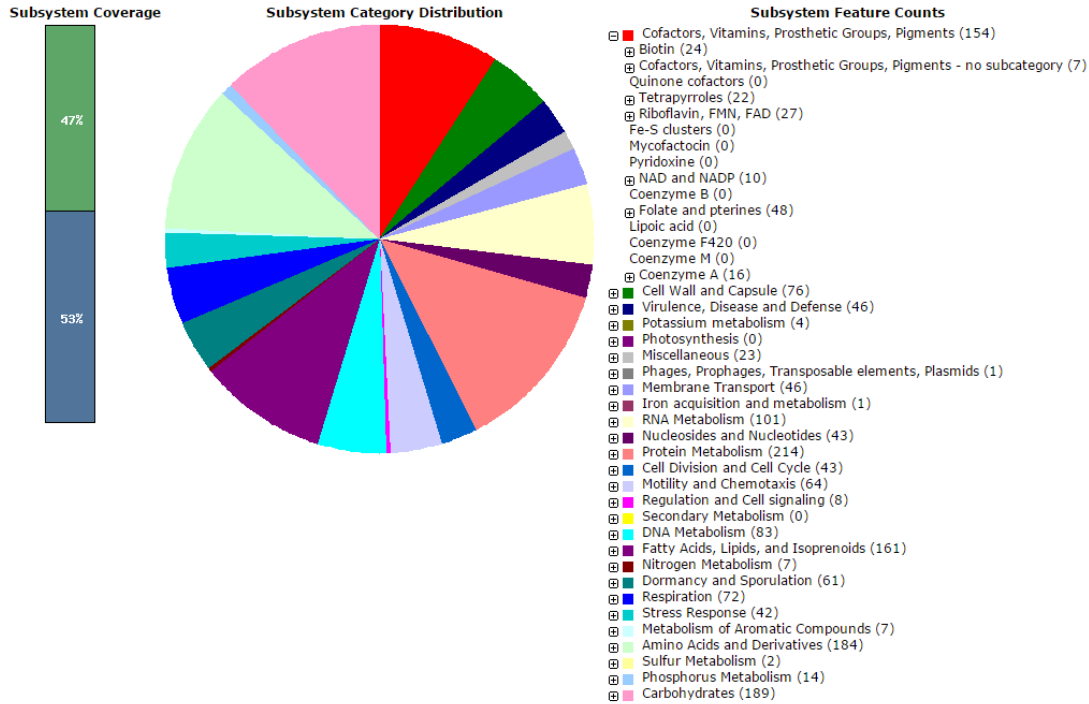

b) Fi09- *Syntrophomonas* sp. DTU018

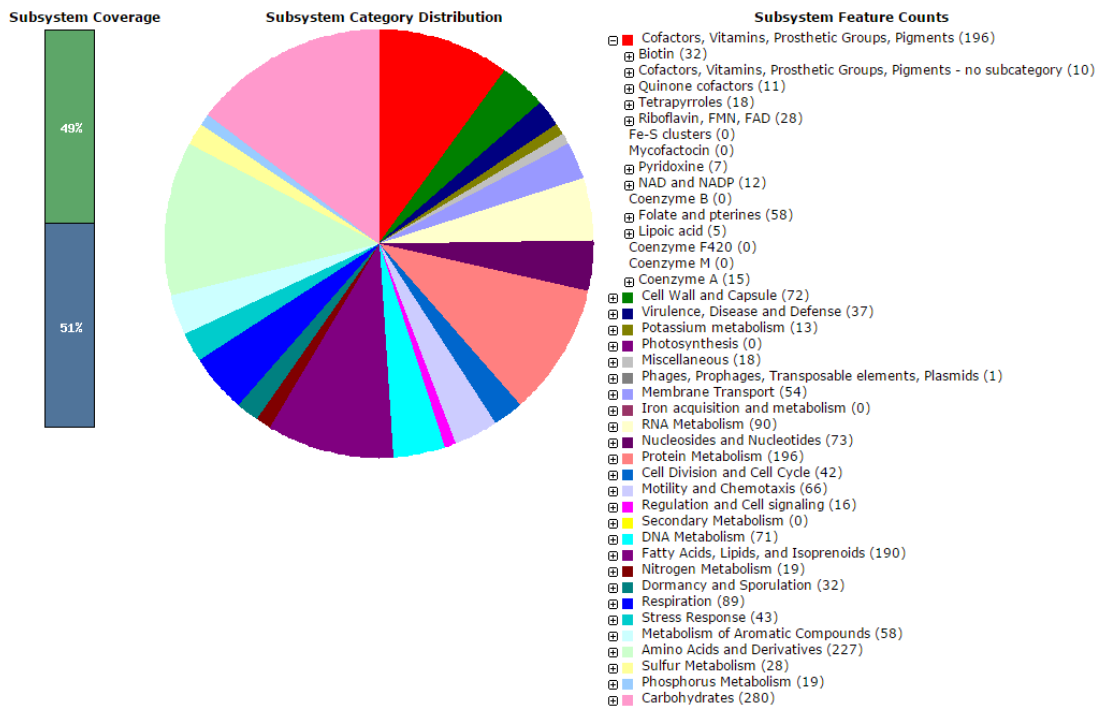

**Supplementary Figure S1.** SEED annotation for a) *Syntrophothermus* sp. (Fi07) and b) *Syntrophomonas* sp. (Fi09) focusing on the subsystem “Cofactors, Vitamins, Prosthetic Groups, Pigments”.
